# Supplementary material for: Development of phospho-specific Rab protein antibodies to monitor in vivo activity of the LRRK2 Parkinson's disease kinase
Source: Oxford University Press journal article supplement (doi:10.1042/bcj20170802), 2017-11-11
Supplement: bcj-2017-0802_supp.pdf [file bcj-2017-0802_supp.pdf]

Supplementary Figure 1

| ANTIBODY                      | WB (lysates of overexpressing cells) |             |             |             |             |             |                     |                     |                     |                     |                     |                     |                     |
|-------------------------------|--------------------------------------|-------------|-------------|-------------|-------------|-------------|---------------------|---------------------|---------------------|---------------------|---------------------|---------------------|---------------------|
|                               | BLEED                                | 1st         | 2nd         | 3rd         | 4th         | 5th         | 6th                 | 7th                 | 8th                 | 9th                 | 10th                | 11th                | 12th                |
| Rab3 pThr86 (SA082)           |                                      | GOOD SIGNAL | GOOD SIGNAL | WEAK SIGNAL | GOOD SIGNAL | GOOD SIGNAL | GOOD SIGNAL         | GOOD SIGNAL         | GOOD SIGNAL         | GOOD SIGNAL         | BLEED NOT AVAILABLE | BLEED NOT AVAILABLE | BLEED NOT AVAILABLE |
| Rab5 pSer84 (S942D)           |                                      | WEAK SIGNAL | WEAK SIGNAL | GOOD SIGNAL | WEAK SIGNAL | GOOD SIGNAL | GOOD SIGNAL         | NO SIGNAL           | GOOD SIGNAL         | GOOD SIGNAL         | GOOD SIGNAL         | GOOD SIGNAL         | GOOD SIGNAL         |
| Rab7L1 (Rab29) pThr71 (S877D) |                                      | NO SIGNAL   | NO SIGNAL   | NO SIGNAL   | WEAK SIGNAL | WEAK SIGNAL | NO SIGNAL           | GOOD SIGNAL         | GOOD SIGNAL         | GOOD SIGNAL         | GOOD SIGNAL         | GOOD SIGNAL         | BLEED NOT AVAILABLE |
| Rab7L1 (Rab29) pSer72 (SA136) |                                      | NO SIGNAL   | NO SIGNAL   | WEAK SIGNAL | GOOD SIGNAL | GOOD SIGNAL | NO SIGNAL           | GOOD SIGNAL         | BLEED NOT AVAILABLE | BLEED NOT AVAILABLE | BLEED NOT AVAILABLE | BLEED NOT AVAILABLE | BLEED NOT AVAILABLE |
| Rab8 pThr72 (S874D)           |                                      | WEAK SIGNAL | GOOD SIGNAL | GOOD SIGNAL | GOOD SIGNAL | GOOD SIGNAL | GOOD SIGNAL         | GOOD SIGNAL         | GOOD SIGNAL         | GOOD SIGNAL         | WEAK SIGNAL         | GOOD SIGNAL         | GOOD SIGNAL         |
| Rab10 pThr73 (S873D)          |                                      | WEAK SIGNAL | WEAK SIGNAL | WEAK SIGNAL | GOOD SIGNAL | GOOD SIGNAL | GOOD SIGNAL         | GOOD SIGNAL         | GOOD SIGNAL         | GOOD SIGNAL         | GOOD SIGNAL         | GOOD SIGNAL         | GOOD SIGNAL         |
| Rab12 pSer106 (S876D)         |                                      | GOOD SIGNAL | GOOD SIGNAL | GOOD SIGNAL | GOOD SIGNAL | GOOD SIGNAL | GOOD SIGNAL         | GOOD SIGNAL         | GOOD SIGNAL         | GOOD SIGNAL         | GOOD SIGNAL         | GOOD SIGNAL         | BLEED NOT AVAILABLE |
| Rab35 pThr72 (SA083)          |                                      | NO SIGNAL   | GOOD SIGNAL | GOOD SIGNAL | GOOD SIGNAL | GOOD SIGNAL | GOOD SIGNAL         | GOOD SIGNAL         | GOOD SIGNAL         | GOOD SIGNAL         | BLEED NOT AVAILABLE | BLEED NOT AVAILABLE | BLEED NOT AVAILABLE |
| Rab43 pThr82 (SA334)          |                                      | GOOD SIGNAL | GOOD SIGNAL | GOOD SIGNAL | GOOD SIGNAL | GOOD SIGNAL | BLEED NOT AVAILABLE | BLEED NOT AVAILABLE | BLEED NOT AVAILABLE | BLEED NOT AVAILABLE | BLEED NOT AVAILABLE | BLEED NOT AVAILABLE | BLEED NOT AVAILABLE |

GOOD SIGNAL
  WEAK SIGNAL
  NO SIGNAL
  BLEED NOT AVAILABLE

**Supplementary Figure 1.** Summary of performance of sheep polyclonal antibodies described in Table 1. All bleeds of each antibody were evaluated by immunoblot analysis and ranked by the indicated scoring system.
